# Supplementary material for: Photon energy transfer by quantum dots in organic–inorganic hybrid solar cells through FRET
Source: Royal Society of Chemistry journal article supplement (doi:10.1039/c6ta02523d), 2016-01-01
Supplement: c6ta02523d1.pdf [file c6ta02523d1.pdf]

## Electronic Supplementary Information (ESI)

### Photon energy transfer by quantum dots in the organic-inorganic hybrid solar cells through FRET

Yong Woon Han<sup>a</sup>, Eui Jin Lee<sup>a</sup>, Jong Nam Park<sup>b</sup>, Tae Hyun Sung<sup>c</sup> and Doo Kyung Moon<sup>a,\*</sup>

<sup>a</sup>Department of Materials Chemistry and Engineering, Konkuk University, 1 Hwayang-dong, Gwangjin-gu, Seoul 05029, Republic of Korea

<sup>b</sup>School of Chemical Engineering, Ulsan National Institute of Science and Technology (UNIST), 100 Banyeon-ri, Ulsan, 44919, Republic of Korea

<sup>c</sup>Department of Electrical Engineering, Hanyang University, Wangsimni-ro, Seongdong-gu, Seoul 04763, Republic of Korea

#### Corresponding Author

\*E-mail : dkmoon@konkuk.ac.kr. Phone : +82 02 450 3498

## Contents

Figure S1. Properties of InP QDs. Ultraviolet photoemission spectroscopy (UPS) to determine energy levels of InP QDs

Figure S2. Performance optimization of BHJ + QDs hybrid solar cells : Current-density versus voltage (J-V) characteristics of conventional InP QDs + PC<sub>71</sub>BM BHJ solar cells under AM 1.5 G illumination with an irradiation intensity of 93 mW cm<sup>-2</sup>

Figure S3. Electrostatic force microscopy (EFM) characteristics of (a) BHJ active layer, (b) BHJ + QDs hybrid active layer, (c) BHJ active layer with PFN interlayer and (d) BHJ + QDs hybrid active layer with PFN interlayer.

Figure S4. Dark current characteristics of BHJ + InP QDs hybrid solar cells under AM 1.5 G illumination with an irradiation intensity of 93 mW cm<sup>-2</sup>

Figure S5. Ratio optimization of BHJ + QDs hybrid solar cells : Current density versus voltage (J-V) characteristics of conventional InP Qs + PC<sub>71</sub>BM solar cells under AM 1.5 G illumination with an irradiation intensity of 93 mW cm<sup>-2</sup>

Figure S6. (a) Electron mobility, (b) Hole mobility of BHJ active layer and BHJ + QDs hybrid active layer devices calculated by Mott-Gurney space charge limited current (SCLC) method.

Figure S7. Contact angle and surface energy characteristics of (a) PTB7, (b) PC<sub>71</sub>BM and (c) InP QDs.

Table S1. Photovoltaic performances of InP QDs + PC<sub>71</sub>BM BHJ solar cells

Table S2. Photovoltaic performances of InP QDs + PC<sub>71</sub>BM BHJ solar cells with respect to InP QDs ratio optimization.

## Supplementary Figures

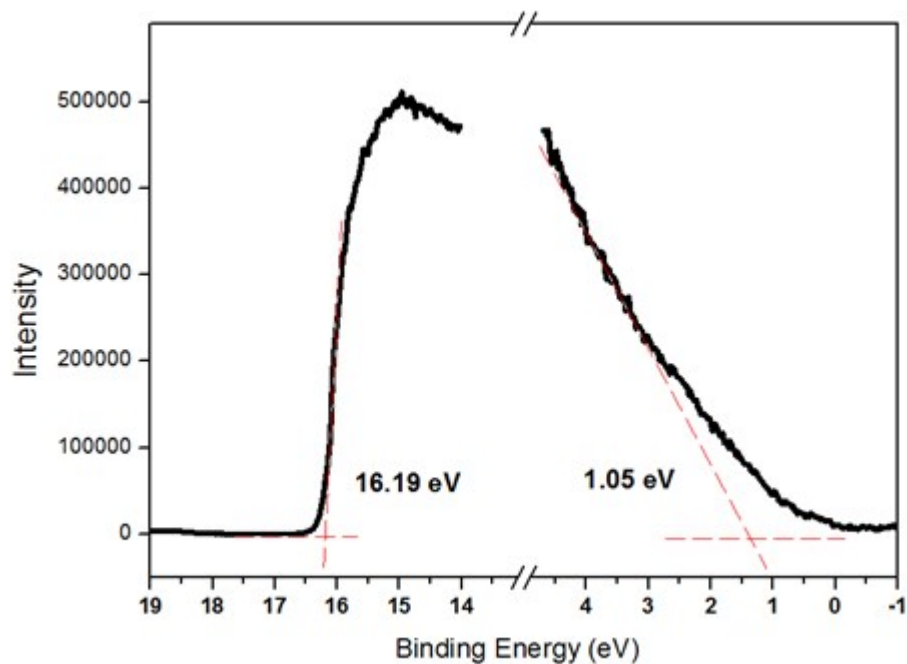

Figure S1. Properties of InP QDs. Ultraviolet photoemission spectroscopy (UPS) to determine energy levels of InP QDs.

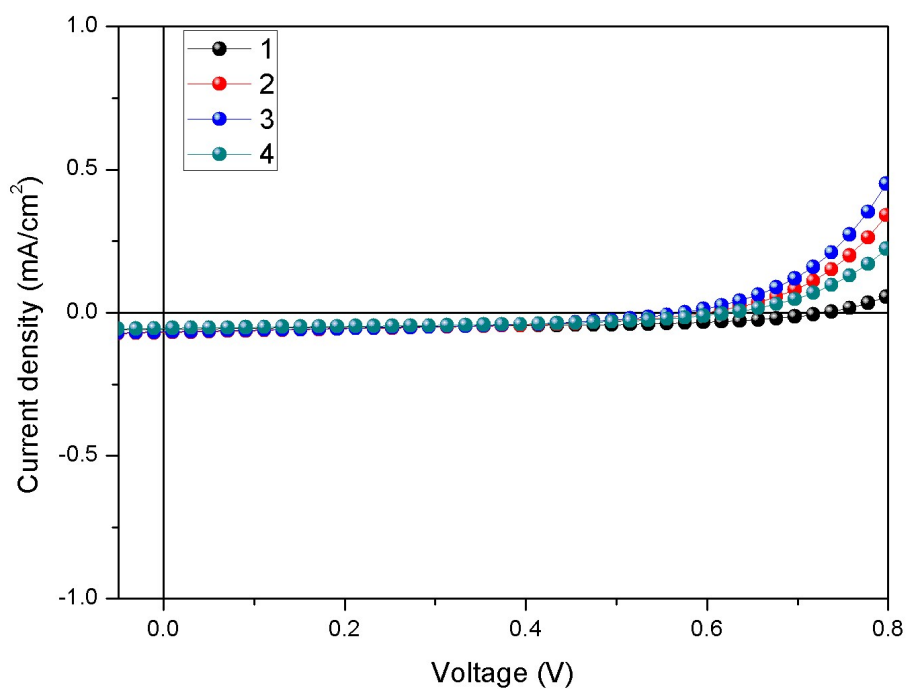

Figure S2. Performance optimization of BHJ + QDs hybrid solar cells : Current-density versus voltage (J-V) characteristics of conventional InP QDs + PC71BM BHJ solar cells under AM 1.5 G illumination with an irradiation intensity of  $93 \text{ mW cm}^{-2}$

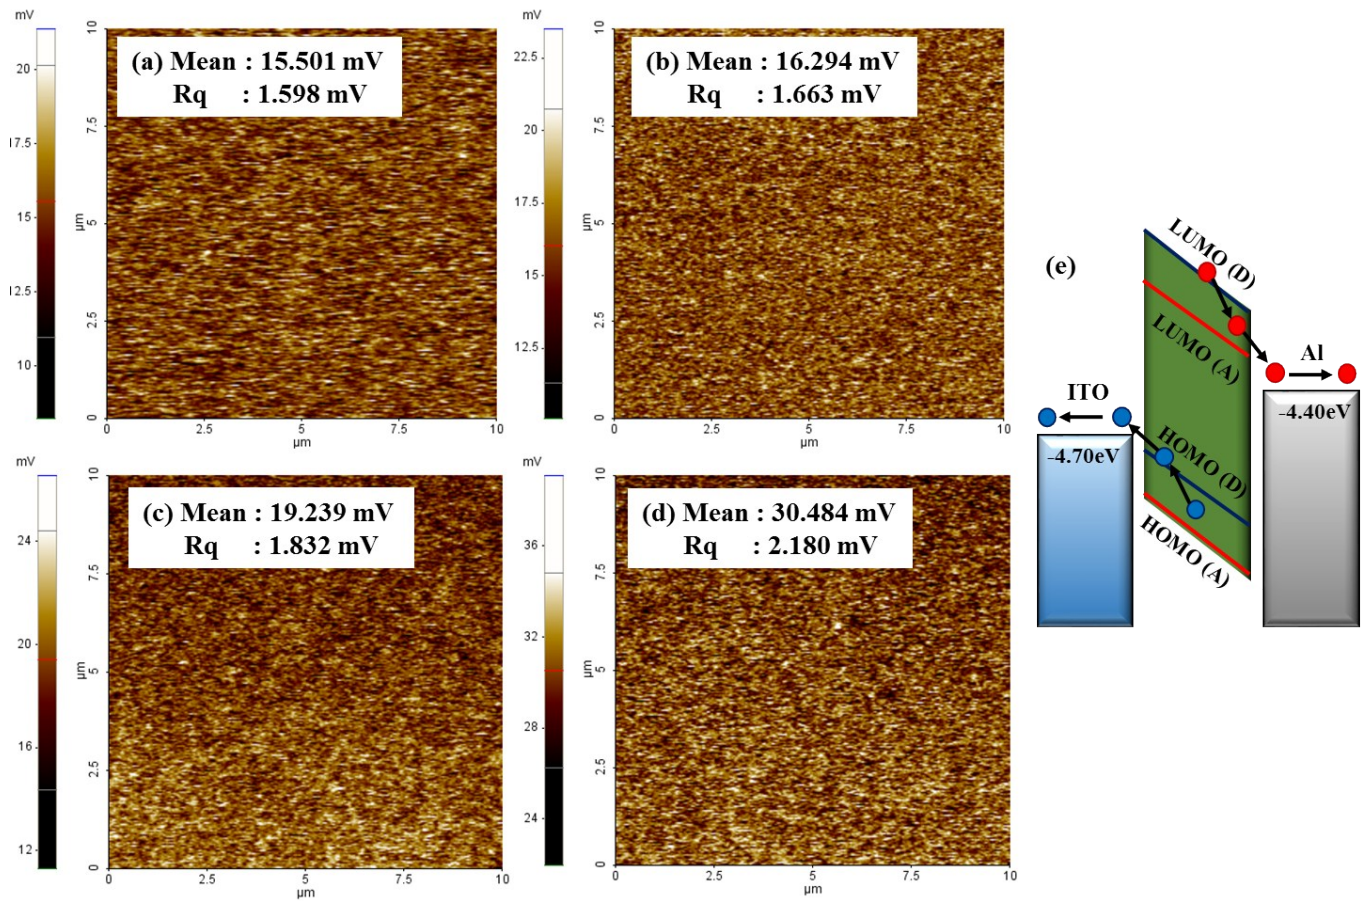

Figure S3. Electrostatic force microscopy (EFM) characteristics of (a) BJJ active layer, (b) BJJ + QDs hybrid active layer, (c) BJJ active layer with PFN interlayer and (d) BJJ + QDs hybrid active layer with PFN interlayer and (e) surface potential alignment in energy diagram in conventional structure solar cells.

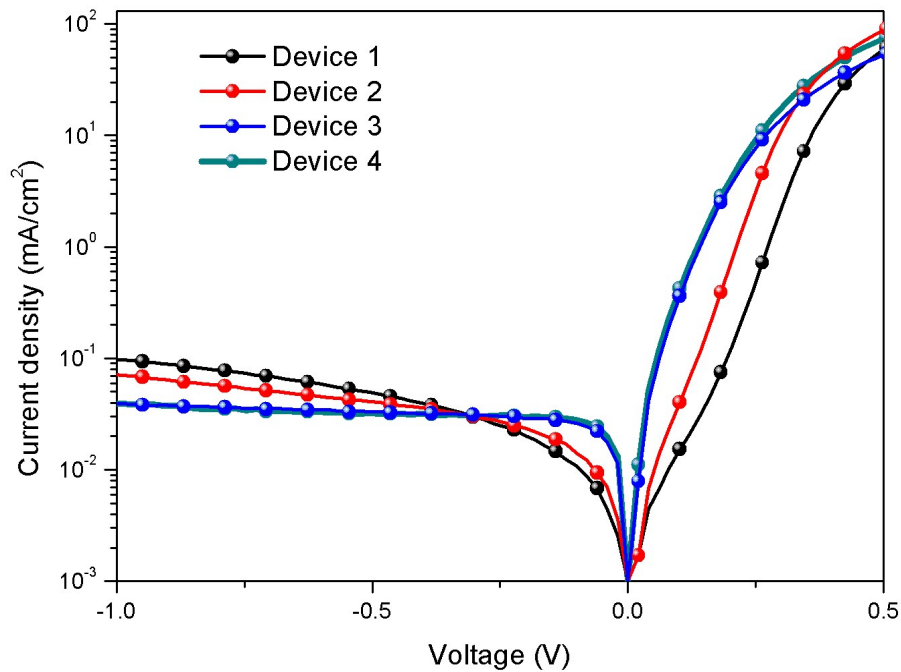

Figure S4. Dark current characteristics of BJJ + InP QDs hybrid solar cells under AM 1.5 G illumination with an irradiation

intensity of  $93 \text{ mW cm}^{-2}$

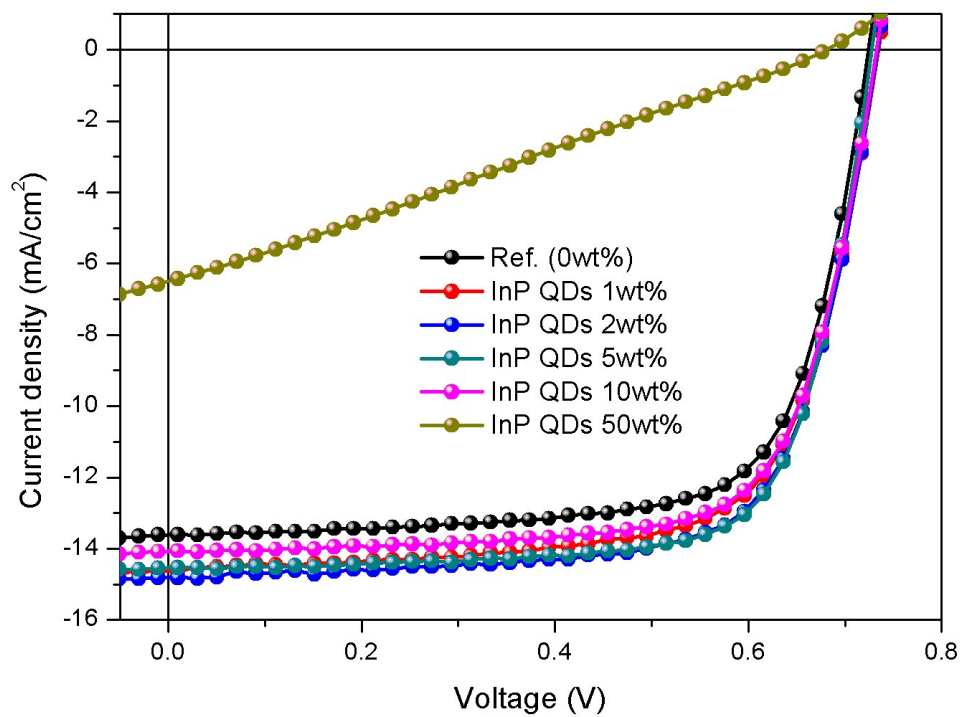

Figure S5. Ratio optimization of BHJ + QDs hybrid solar cells : Current density versus voltage (J-V) characteristics of conventional InP Qs + PC<sub>71</sub>BM solar cells under AM 1.5 G illumination with an irradiation intensity of  $93 \text{ mW cm}^{-2}$

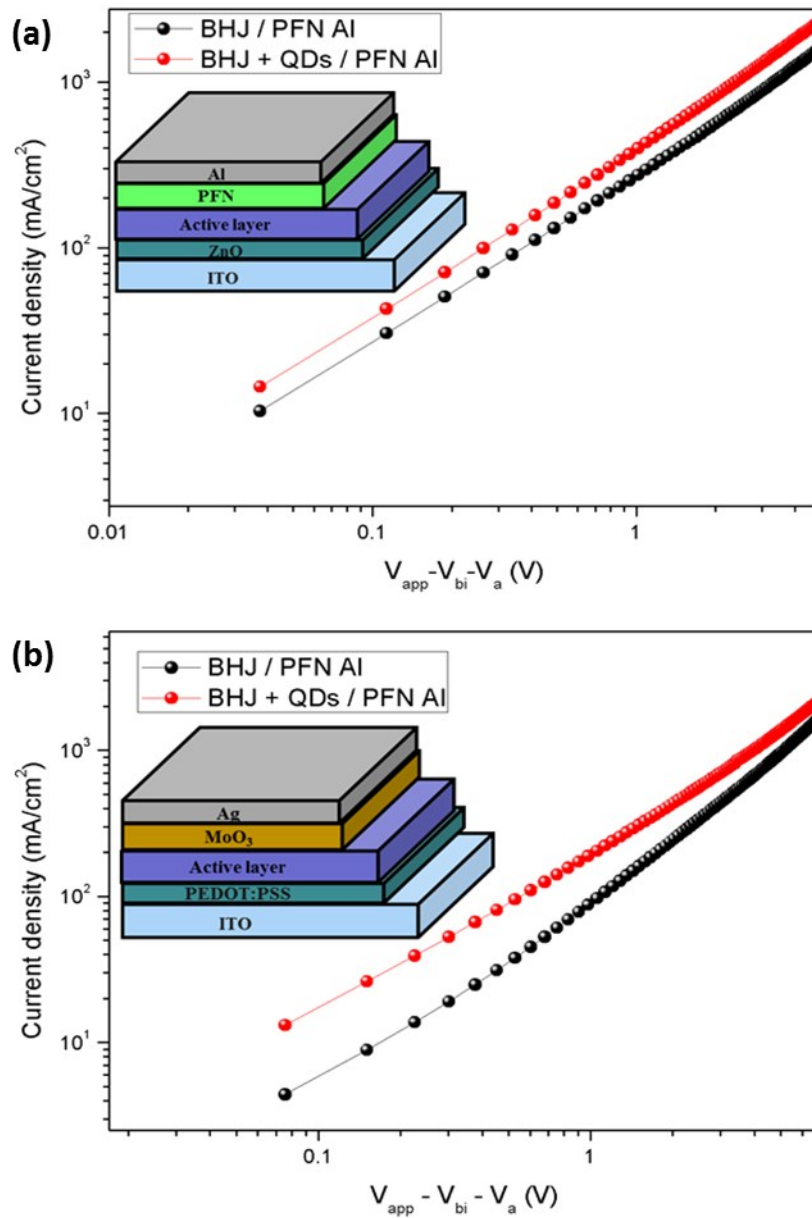

Figure S6. (a) Electron mobility, (b) Hole mobility of BHJ active layer and BHJ + QDs hybrid active layer devices calculated by Mott-Gurney space charge limited current (SCLC) method.

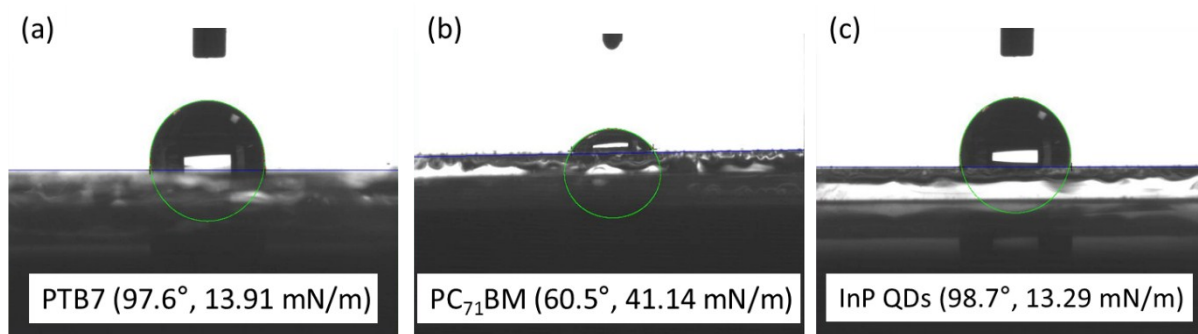

Figure S7. Contact angle and surface energy characteristics of (a) PTB7, (b) PC<sub>71</sub>BM and (c) InP QDs.

## Supplementary Table

Table S1. Photovoltaic performances of InP QDs + PC<sub>71</sub>BM BHJ solar cells

| Device structure | Jsc [mA/cm <sup>2</sup> ] | Voc [V] | FF [%] | PCE [%] |
|------------------|---------------------------|---------|--------|---------|
| Device S1        | 0.039                     | 0.696   | 45.4   | 0.013   |
| Device S2        | 0.037                     | 0.636   | 45.2   | 0.011   |
| Device S3        | 0.057                     | 0.737   | 49.5   | 0.022   |
| Device S4        | 0.067                     | 0.595   | 42.5   | 0.018   |

Fabricated solar cells structure : ITO/PEDOT:PSS/active layer(InP + PC<sub>71</sub>BM)/Al

Table S2. Photovoltaic performances of InP QDs + PC<sub>71</sub>BM BHJ solar cells with respect to InP QDs ratio optimization.

| Device structure     | Jsc [mA/cm <sup>2</sup> ] | Voc [V] | FF [%] | PCE [%] |
|----------------------|---------------------------|---------|--------|---------|
| BHJ (Device 4)       | 13.6                      | 0.717   | 72.2   | 7.6     |
| BHJ + 1 wt% InP QDs  | 14.6                      | 0.737   | 69.2   | 7.9     |
| BHJ + 2 wt% InP QDs  | 14.8                      | 0.737   | 70.7   | 8.1     |
| BHJ + 5 wt% InP QDs  | 14.5                      | 0.737   | 72.6   | 8.4     |
| BHJ + 10 wt% InP QDs | 14.1                      | 0.737   | 71.1   | 7.9     |
| BHJ + 50 wt% InP QDs | 6.4                       | 0.676   | 26.5   | 1.2     |

Fabricated solar cells structure : ITO/PEDOT:PSS/active layer(InP + PC<sub>71</sub>BM)/PFN/Al
